# Supplementary material for: Changes in Sphingolipid Profile of Benzo[a]pyrene-Transformed Human Bronchial Epithelial Cells Are Reflected in the Altered Composition of Sphingolipids in Their Exosomes
Source: MDPI journal article supplement (doi:10.3390/ijms22179195), 2021-08-25

## Supplementary Information

### **Machala et al.: Transformation of human bronchial epithelial cells induced by benzo[a]pyrene is reflected in altered lipidomic profile of exosomes**

Supplementary Table S1.

Supplementary Table S2.

Supplementary Table S3.

Supplementary Figure S1.

#### **Supplementary Table S1.** List of internal standards for SL and GSL analyses.

**Avanti Polar Lipids Inc., lot number LM6005, Ceramide/Sphingoid Internal Standard Mix II**

| <b>Lipid species</b>                                          | <b>Abbreviation</b> | <b>Molecular ion<br/>[m/z]</b> | <b>MW</b> |
|---------------------------------------------------------------|---------------------|--------------------------------|-----------|
| C12 sphingomyelin                                             | SM 12-0             | 647.3                          | 646.3     |
| C12 ceramide                                                  | Cer 12-0            | 482.4                          | 481.4     |
| C12 Glucosyl( $\beta$ ) - ceramide                            | GlcCer 12-0         | 644.6                          | 643.6     |
| C12 lactosyl( $\beta$ ) - ceramide                            | LacCer 12-0         | 806.6                          | 805.6     |
| C12 ceramide-1-phosphate                                      | CerP 12-0           | 562.4                          | 561.4     |
| C17 sphingosine                                               | So 17-1             | 286.3                          | 285.3     |
| C17 sphinganine (dihydro-sphingosine)                         | Sa 17-0             | 288.3                          | 287.3     |
| C17 sphingosine-1-phosphate                                   | So 17-1-P           | 366.3                          | 365.3     |
| C17 sphinganine-1-phosphate (dihydro-sphingosine-1-phosphate) | So 17-1-P           | 368.2                          | 367.2     |

**Avanti Polar Lipids Inc., lot numbers 860573P and 860073W**

|                                                            |             |       |        |
|------------------------------------------------------------|-------------|-------|--------|
| C12 Mono-Sulfo galactosyl( $\beta$ ) Ceramide (d18:1/12:0) | Sulf 12/0   | 725.1 | 741.0  |
| C18:0 GM3-d5 (synthetic)                                   | GM3 18/0 d5 | 594.3 | 1203.5 |

**Supplementary Table S2.** List of external standards for eicosanoid analysis (Cayman Chemical Company, Ann Arbor, MI, USA).

| Lipid species                                       | Abbreviation                       | Molecular ion [m/z] | MW    |
|-----------------------------------------------------|------------------------------------|---------------------|-------|
| 6 – keto prostaglandin F <sub>1α</sub>              | 6-keto-PGF <sub>1α</sub>           | 370.2               | 370.5 |
| prostaglandin D <sub>2</sub>                        | PGD <sub>2</sub>                   | 352.2               | 352.5 |
| prostaglandin E <sub>2</sub>                        | PGE <sub>2</sub>                   | 352.2               | 352.5 |
| prostaglandin A <sub>2</sub>                        | PGA <sub>2</sub>                   | 334.2               | 334.5 |
| prostaglandin J <sub>2</sub>                        | PGJ <sub>2</sub>                   | 334.2               | 334.5 |
| prostaglandin F <sub>2α</sub>                       | PGF <sub>2α</sub>                  | 354.2               | 354.5 |
| prostaglandin F <sub>2β</sub>                       | PGF <sub>2β</sub>                  | 354.2               | 354.5 |
| 8-iso prostaglandin F <sub>2β</sub>                 | 8-Iso- PGF <sub>2β</sub>           | 354.2               | 354.5 |
| 15-keto prostaglandin E <sub>2</sub>                | 15-keto- PGE <sub>2</sub>          | 350.2               | 350.5 |
| 13,14-dihydro-15- keto prostaglandin E <sub>2</sub> | 13,14-DH-15-keto- PGE <sub>2</sub> | 352.2               | 352.5 |
| 13,14-dihydro-15- keto prostaglandin D <sub>2</sub> | 13,14-DH-15-keto- PGD <sub>2</sub> | 352.2               | 352.5 |
| Lipoxin A <sub>4</sub>                              | LXA <sub>4</sub>                   | 352.2               | 352.5 |
| 20- hydroxyeicosatetraenoic acid                    | 20-HETE                            | 320.2               | 320.5 |
| 15- hydroxyeicosatetraenoic acid                    | 15-HETE                            | 320.2               | 320.5 |
| 8- hydroxyeicosatetraenoic acid                     | 8-HETE                             | 320.2               | 320.5 |
| 12- hydroxyeicosatetraenoic acid                    | 12-HETE                            | 320.2               | 320.5 |
| 13-hydroxyoctadecadienoic acid                      | 13-HODE                            | 296.2               | 296.5 |
| 9-hydroxyoctadecadienoic acid                       | 9-HODE                             | 296.2               | 296.5 |
| Arachidonic acid                                    | AA                                 | 304.2               | 304.5 |

**Supplementary Table S3.** Primers and probes for RT-qPCR.

| Gene     | TaqMan assay ID |
|----------|-----------------|
| UGCG     | Hs00916612_m1   |
| UTG8     | Hs00409958_m1   |
| GALC     | Hs00164660_m1   |
| GBA      | Hs00986836_g1   |
| GBA2     | Hs01107320_g1   |
| B4GALT5  | Hs00941041_m1   |
| B4GALT6  | Hs00999574_m1   |
| GLA      | Hs00609238_m1   |
| GAL3ST1  | Hs00191582_m1   |
| CERT     | Hs01062552_m1   |
| FAPP2    | Hs01696164_s1   |
| ST3GAL5  | Hs01105377_m1   |
| NEU3     | Hs00198406_m1   |
| B4GALNT1 | Hs01110791_g1   |
| B3GALT4  | Hs00534104_s1   |
| HEXA     | Hs00942655_m1   |
| HEXB     | Hs01077594_m1   |
| ST8SIA1  | Hs01124292_m1   |
| ST8SIA4  | Hs00379924_m1   |
| ST8SIA5  | Hs00203298_m1   |
| ST8SIA6  | Hs02341869_g1   |
| A4GALT   | Hs05058505_s1   |
| B3GALNT1 | Hs00364202_sl   |
| PTGDS    | Hs00168748_m1   |
| PTGES    | Hs00610420_m1   |
| PTGES2   | Hs00228159_m1   |

| Gene   | Nucleotide<br>acc.no.                                       | Primers                 |                            | UPL probe no. |
|--------|-------------------------------------------------------------|-------------------------|----------------------------|---------------|
|        |                                                             | forward                 | reverse                    |               |
| B3GNT5 | NM_032047.4                                                 | tcaaaactctgtttgccttagga | cccaagccagttttctttgt       | 7             |
| PTGS2  | NM_000963.2                                                 | cttcacgcatcagttttcaag   | tcaccgtaaatatgatttaagtccac | 23            |
| GLB1   | Assay ID 115378 GLB1 human; kat. number 05532957001 (Roche) |                         |                            | -             |

**Supplementary Figure S1.** Differences in SL (A) and GSL (B) species in BaP-transformed and parental HBEC-12KT cells and their exosomes. The levels of SL/GSL were measured by LC/MS-MS and are expressed relative to parental HBEC-12KT as means  $\pm$  standard deviation obtained from three independent experiments performed in triplicates for cells and five experiments performed in monoplicates for exosomes. The asterisks denote a significant difference between the effects \* $p$ <0.05, \*\* $p$ < 0.01.

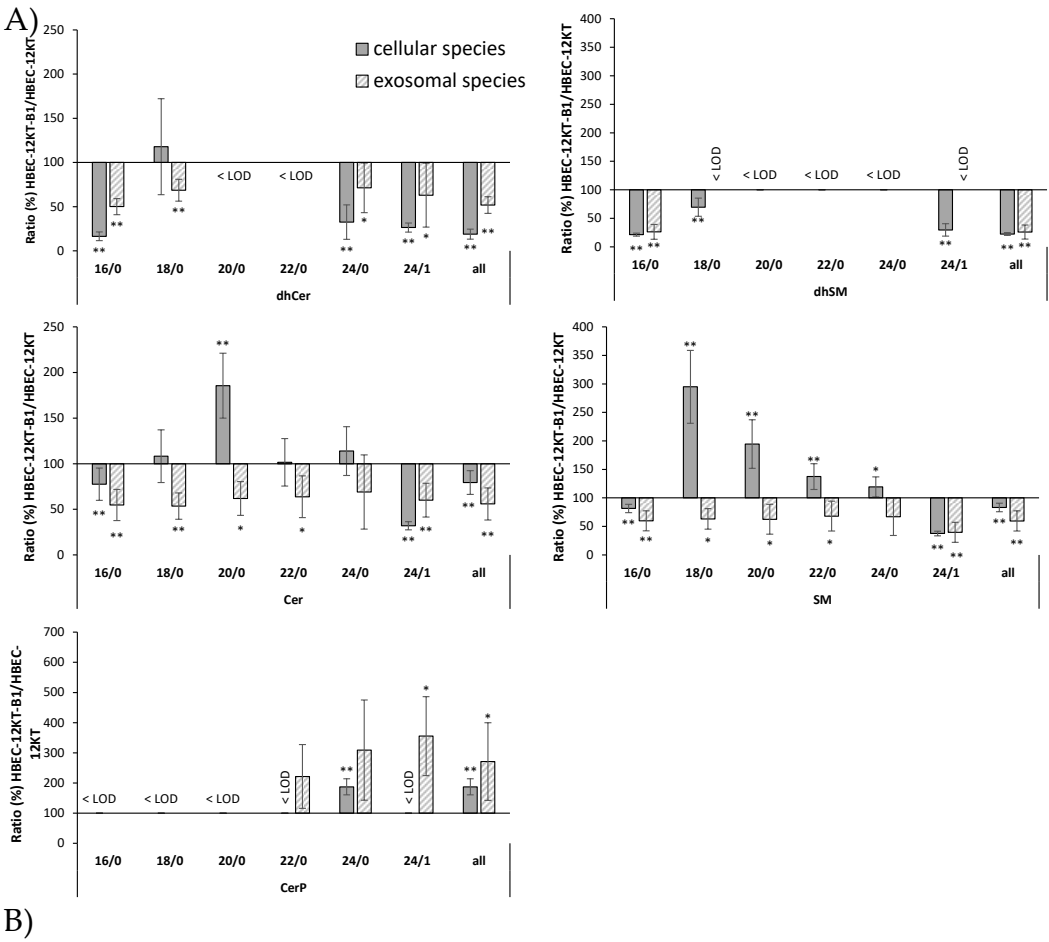

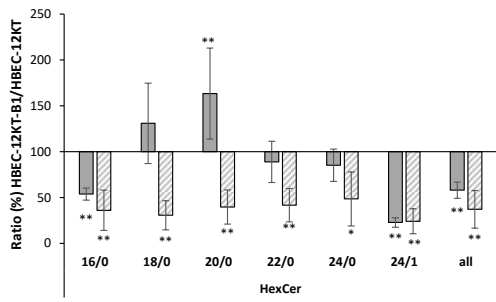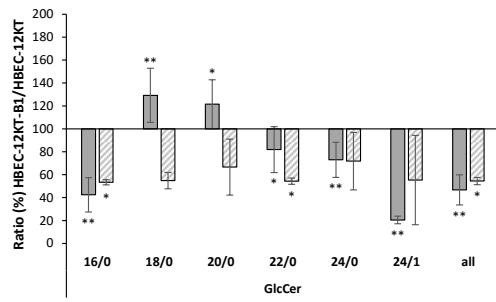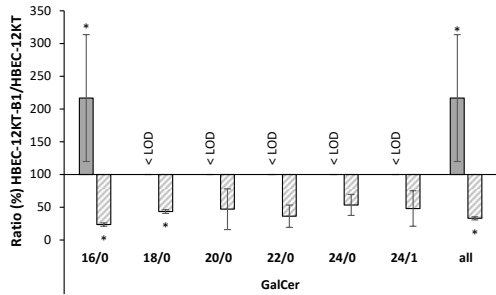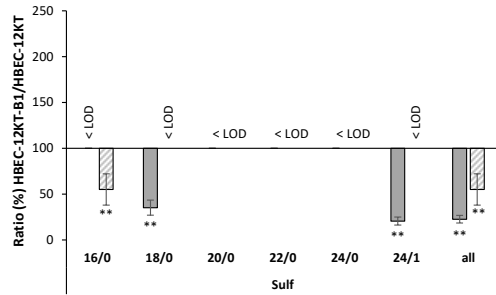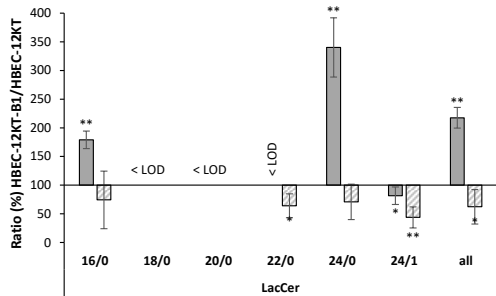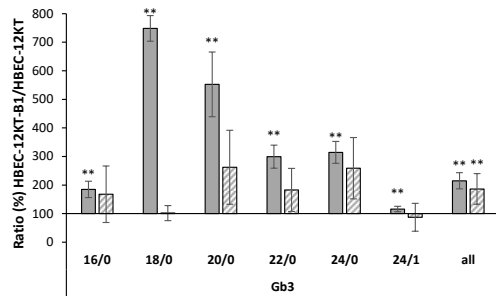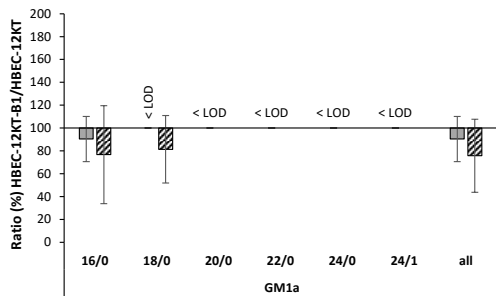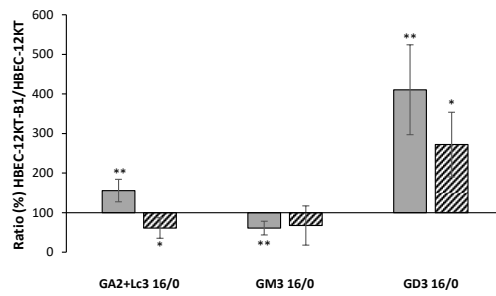

Supplement: s1 [file s1]
